# Supplementary material
Source: MDPI journal article supplement (https://www.mdpi.com/2073-4441/13/6/877)
Supplement: s1 [file s1]

Article

# Forested Riparian Zones Provide Important Habitat for Fish in Urban Streams

Benjamin Kupilas<sup>1,2\*</sup>, Francis J. Burdon<sup>3</sup>, Jens Thaulow<sup>1</sup>, Johnny Häll<sup>1</sup>, Petra Thea Mutinova<sup>1</sup>, Marie Anne Eurie Forio<sup>4</sup>, Felix Witing<sup>5</sup>, Geta Rîșnoveanu<sup>6,7</sup>, Peter Goethals<sup>4</sup>, Brendan G. McKie<sup>3</sup> and Nikolai Friberg<sup>1,8,9</sup>

## Supplementary Materials

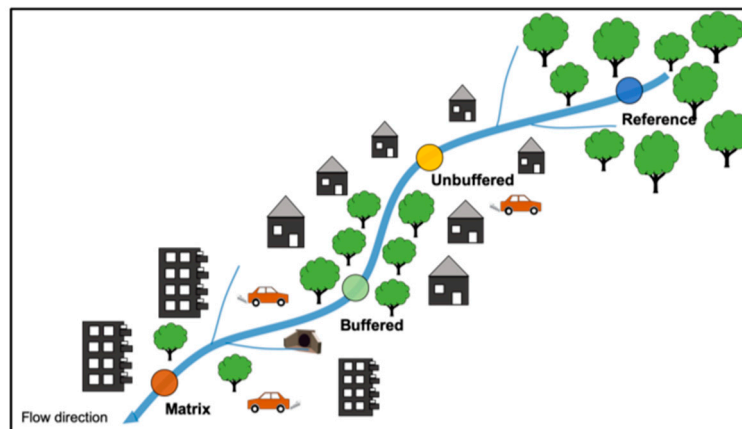

**Figure S1.** Experimental design in the Oslo Fjord Basin with pristine or least-impacted 'Reference' sites (blue), site pairs with an 'Unbuffered' upstream site (orange) and a downstream 'Buffered' site (green) with a woody riparian buffer on both banks, and 'Longitudinal' sites (red) that were typically located further downstream from the other site types to capture cumulative land use impacts with different configurations of the riparian zones.

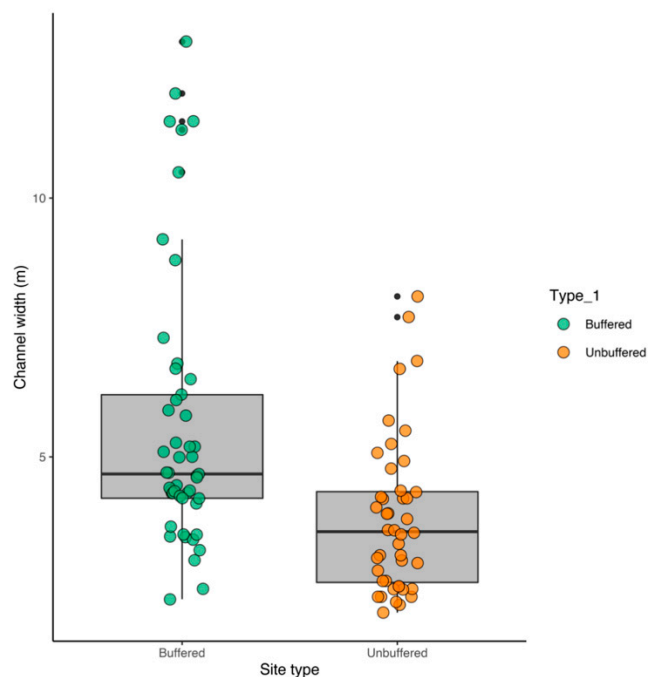

**Figure S2.** Wetted channel widths from transect measurements at buffered and unbuffered sites in the Oslo Fjord Basin.

**Table S1.** Description of scores for riparian attributes used to calculate the Riparian Condition Index (after Burdon et al. [1]).

| Attributes                                                               |               | Scores 1                                                                                            | Scores 2                                                                                         | Scores 3                                                                                                                      | Scores 4                                                                                                                                | Scores 5                                                                                                   |
|--------------------------------------------------------------------------|---------------|-----------------------------------------------------------------------------------------------------|--------------------------------------------------------------------------------------------------|-------------------------------------------------------------------------------------------------------------------------------|-----------------------------------------------------------------------------------------------------------------------------------------|------------------------------------------------------------------------------------------------------------|
| Shading of water                                                         |               | Little or no shading                                                                                | 10–25% shading                                                                                   | 25–50%                                                                                                                        | 50–80%                                                                                                                                  | >80%                                                                                                       |
| Buffer width                                                             |               | <1 m                                                                                                | 1–5 m                                                                                            | 5–15 m                                                                                                                        | 15–30 m                                                                                                                                 | >30 m                                                                                                      |
| Buffer intactness                                                        |               | Buffer absent                                                                                       | 50–99% gaps                                                                                      | 20–50% gaps                                                                                                                   | 1–20% gaps                                                                                                                              | Completely intact                                                                                          |
| Vegetation comp. of buffer and/or adjacent land to 30 m from stream-bank | Buffer        |                                                                                                     |                                                                                                  |                                                                                                                               |                                                                                                                                         |                                                                                                            |
|                                                                          | Adjacent land | Short, grazed pasture grasses to stream edge, or impervious surfaces                                | Invasive weedy shrubs gorse, blackberry, broom, or mainly high grasses or low shrubs 0.3–2 m     | Deciduous tree dominated; small tree dom. (2–5 m); or forest plantation with <25% cover of >5 m trees; or natural grassy veg. | Regenerating forest or woodlot evergreens with >25% cover sub-canopy (>5 m) trees but <10% canopy trees (>12 m); or natural grassy veg. | Maturing forest including >10% cover canopy trees (>12 m); or natural wetland or natural grassy vegetation |
| Bank stability                                                           |               | Very low: uncohesive sediments & few roots & >40% recently eroded                                   | Low: uncohesive sediments & few roots/low veg. cover & >15–40% recently eroded                   | Moderate: stabilized by geology (e.g. cobbles), veg cover &/or roots & >5–15% recently eroded                                 | High: stabilized by geology (e.g. bedrock), veg. cover &/or roots; & 1–5% recently eroded                                               | Very high: stabilized by geology (e.g. bedrock), veg. cover &/or roots; <1% recently eroded                |
| Livestock access                                                         |               | High: unfenced and unmanaged with active livestock use                                              | Moderate: some livestock access                                                                  | Limited: unfenced but low stocking, bridges, troughs, natural deterrents                                                      | Very limited: temporary fencing of all livestock or naturally very limited access                                                       | None: permanent fencing or no livestock                                                                    |
| Riparian soil denitrification potential                                  |               | Soils dry/firm underfoot or moist-wet but frequent tile drains bypass riparian soils (≥3 per 100 m) | 1–30% streambank soils moist but firm or moist-wet with infrequent bypass drains (1–2 per 100 m) | ≥30% streambank soils moist but firm underfoot. No drains.                                                                    | 1–30% streambank soils water-logged, soft underfoot with black soil. No drains.                                                         | ≥30% of streambanks water-logged, surface moist/fluid underfoot. No drains.                                |
| Land slope 0–30 m from stream bank                                       |               | >35°                                                                                                | >20–35°                                                                                          | >10–20°                                                                                                                       | >5–10°                                                                                                                                  | 0–5°                                                                                                       |
| Groundcover of buffer and/or adjacent land to 30 m from stream-bank      | Buffer        |                                                                                                     |                                                                                                  |                                                                                                                               |                                                                                                                                         |                                                                                                            |
|                                                                          | Adjacent land | Bare                                                                                                | Short/regularly grazed pasture (<3 cm)                                                           | Pasture grass/tussock with bare flow paths or 2–3 cm tree litter layer                                                        | Moderate density grass or dense (>3 cm) tree litter layer                                                                               | High density long grass                                                                                    |
| Soil drainage                                                            |               | Impervious (e.g. sealed) or extensively pugged and/or compacted soil                                | Low permeability (e.g. high clay content) or moderately pugged/compacted soil                    | Low-moderate permeability (e.g. silt/loam) and not pugged/compacted                                                           | Mod-high permeability (e.g. sandy loam) & not pugged/compacted                                                                          | Very high permeability (e.g. pumice/sand) & not pugged/compacted                                           |
| Rills/channels                                                           |               | Frequent rills (> 9 per 100 m) or larger channels carry most runoff                                 | Common rills (4–9 per 100 m) or 1–2 larger channels carry some runoff                            | Infrequent rills (2–3 per 100 m) and no larger channels                                                                       | Rare rills (1 per 100 m) and no larger channels                                                                                         | None                                                                                                       |

**Table S2.** Information about buffered/unbuffered sites including RCI, total number of fish per site, and density calculated per m reach and per m<sup>2</sup>. UBF = unbuffered site, FBF = buffered site, RCI = Riparian Condition Index.

| Site Number | Site Type | Stream          | RCI   | Total Number Fish | Density (m Reach) | Density (m2) |
|-------------|-----------|-----------------|-------|-------------------|-------------------|--------------|
| 6           | UBF       | Alna            | 31    | 0                 | NA                | NA           |
| 7           | FBF       | Alna            | 51    | 0                 | NA                | NA           |
| 8           | UBF       | Hovinbekken     | 51    | 4                 | 0.13              | 0.05         |
| 9           | FBF       | Hovinbekken     | 52    | 42                | 1.4               | 0.64         |
| 14          | UBF       | Frognerelva     | 39    | 59                | 1.97              | 0.74         |
| 15          | FBF       | Frognerelva     | 51    | 107               | 3.57              | 1.24         |
| 18          | UBF       | Gaustadbekken   | 32    | 0                 | NA                | NA           |
| 19          | FBF       | Gaustadbekken   | 36    | 0                 | NA                | NA           |
| 21          | UBF       | Skådalsbekken   | 39    | 26                | 0.87              | 0.37         |
| 22          | FBF       | Skådalsbekken   | 39.5  | 30                | 1                 | 0.69         |
| 25          | UBF       | Midtstubekken   | 40.5  | 21                | 0.70              | 0.37         |
| 26          | FBF       | Midtstubekken   | 51    | 13                | 0.43              | 0.14         |
| 28          | UBF       | Makrelbekken    | 35    | 0                 | NA                | NA           |
| 29          | FBF       | Makrelbekken    | 48.5  | 0                 | NA                | NA           |
| 32          | UBF       | Mærradalsbekken | 46.5  | 104               | 3.47              | 3.05         |
| 33          | FBF       | Mærradalsbekken | 53.5  | 157               | 5.23              | 2.28         |
| 35          | UBF       | Sandvikselva    | 33.25 | 25                | 0.83              | 0.18         |
| 36          | FBF       | Sandvikselva    | 42.5  | 39                | 1.30              | 0.34         |

**Table S3.** Variables and loadings for Principal Components Analysis (PCA) decomposing catchment land use and water quality variables into a single index of urbanization for all 30 sites in the Oslo basin. PC1 explained 56.3% of the variation among sites, whereas PC2 explained 16.5%. TIN = Total Inorganic Nitrogen (NH<sub>4</sub> N + Nitrate), NH<sub>4</sub> = Ammonium (NH<sub>4</sub> N), Nitrate = NO<sub>2</sub>+NO<sub>3</sub> N, SRP = Soluble reactive phosphate (PO<sub>4</sub> P), TP = Total phosphorous.

| Group         | Parameter       | PC1   | PC2   |
|---------------|-----------------|-------|-------|
| Water quality | pH              | 0.9   | -0.06 |
|               | Cond.           | 1.03  | 0.25  |
|               | TIN             | 1.1   | 0.27  |
|               | NH <sub>4</sub> | 0.84  | -0.51 |
|               | Nitrate         | 1.04  | 0.36  |
|               | SRP             | 1.01  | -0.52 |
|               | TP              | 1.04  | -0.48 |
| Land use      | %Arable         | -0.11 | -0.89 |
|               | %Forest         | -1.16 | -0.13 |
|               | %Natural        | -0.43 | 0.25  |
|               | %Other          | 1.03  | -0.05 |
|               | %Urban          | 1.13  | 0.19  |
|               | %Water          | -0.26 | -1.13 |

**Table S4.** Fish species and their abundances from study sites across the Oslo Fjord basin.

| Fish species                 | Abundance |
|------------------------------|-----------|
| <i>Salmo trutta</i>          | 1026      |
| <i>Salvelinus fontinalis</i> | 56        |
| <i>Phoxinus phoxinus</i>     | 1         |
| <i>Pleuronectidae</i>        | 2         |

**Table S5.** Results from the Generalised Linear Mixed model testing the relationship between the Riparian Condition Index (RCI) and fish abundances.

| Predictors                                           | Fish numbers          |           |        |
|------------------------------------------------------|-----------------------|-----------|--------|
|                                                      | Incidence Rate Ratios | CI        | p      |
| (Intercept)                                          | 0.67                  | 0.07–6.75 | 0.735  |
| RCI                                                  | 1.05                  | 1.03–1.07 | <0.001 |
| <b>Random Effects</b>                                |                       |           |        |
| $\sigma^2$                                           | 0.19                  |           |        |
| $\tau_{00}$ Site_block                               | 8.58                  |           |        |
| ICC                                                  | 0.98                  |           |        |
| N Site_block                                         | 9                     |           |        |
| Observations                                         | 18                    |           |        |
| Marginal R <sup>2</sup> / Conditional R <sup>2</sup> | 0.014 / 0.979         |           |        |

## References

1. Burdon, J.F.; Ramberg, E.; Sargac, J.; Forio, A.M.; de Saeyer, N.; Mutinova, T.P.; Moe, F.T.; Pavelescu, O.M.; Dinu, V.; Cazacu, C., et al. Assessing the benefits of forested riparian zones: A qualitative index of riparian integrity is positively associated with ecological status in european streams. *Water* 2020, 12. <https://doi.org/10.3390/w12041178>
